# Supplementary material
Source: Preprints.org preprint supplement (doi:10.20944/preprints202102.0177.v1)

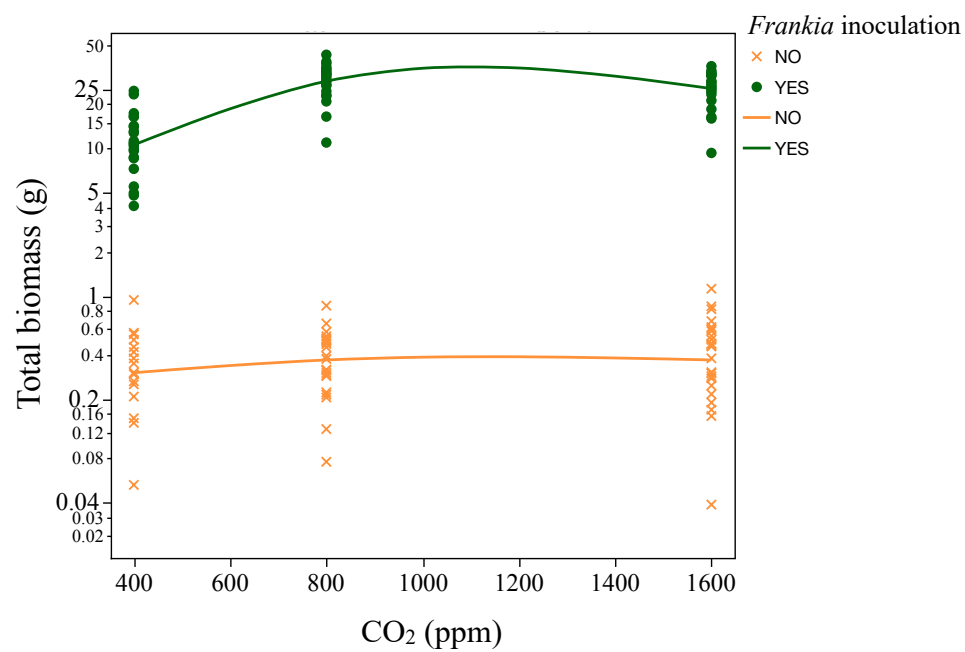

Supplement: Supplementary file 1 [file supplementary]

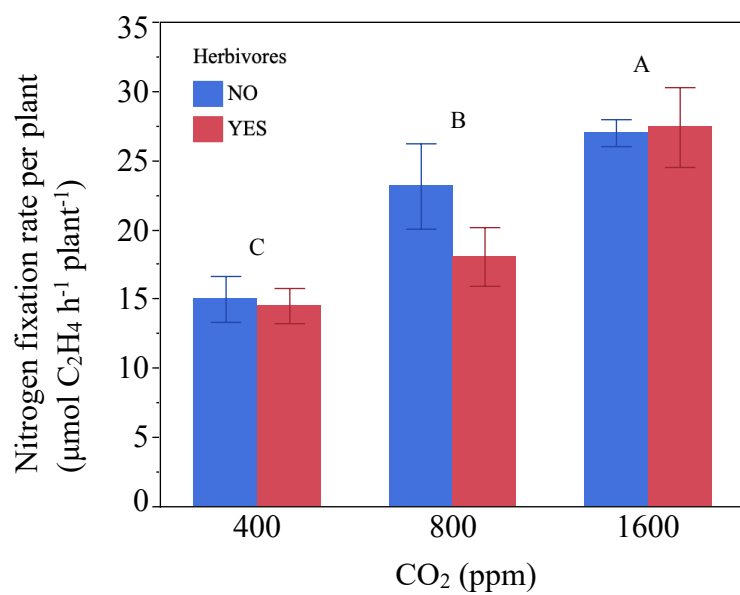

Supplement: Supplementary file 4 [file supplementary]

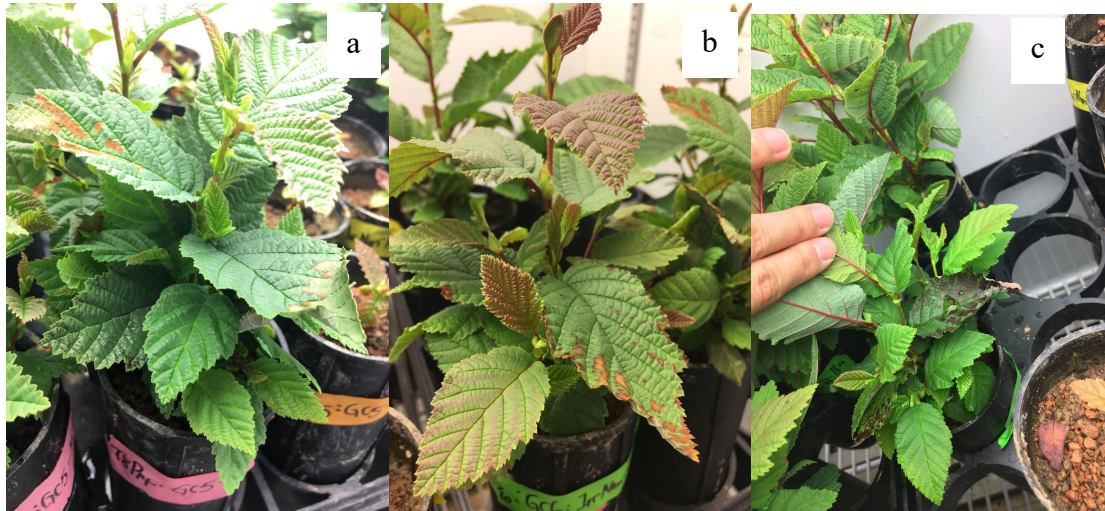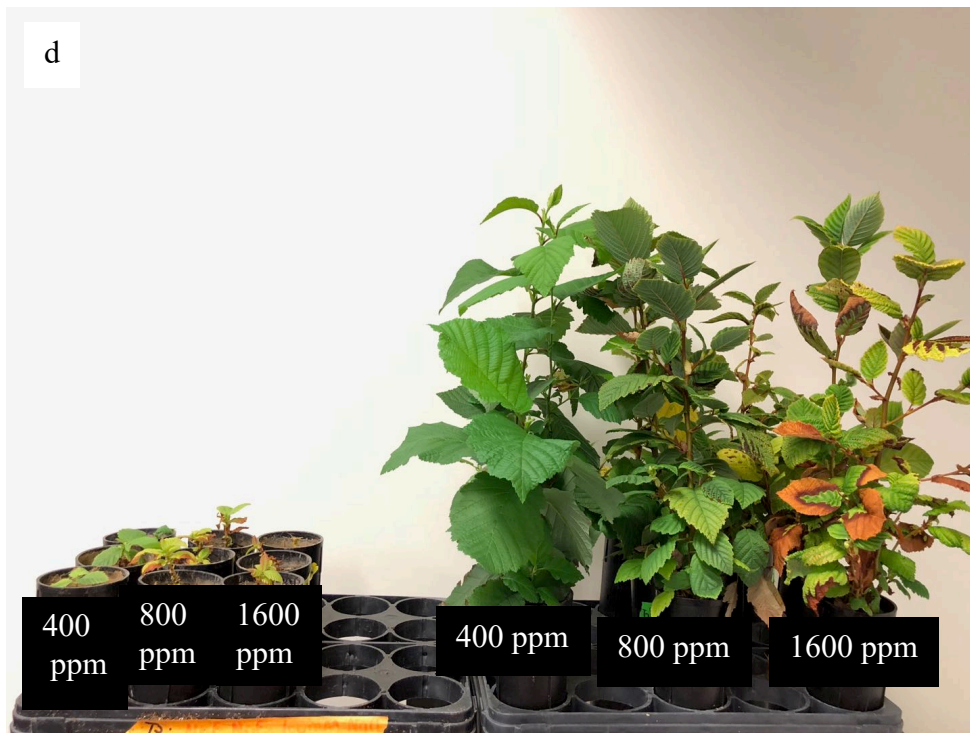

Supplement: Supplementary file 5 [file supplementary]
